# Supplementary material for: Occupational cold exposure is associated with increased reporting of airway symptoms
Source: PubMed Central journal article supplement (PMC8490236; doi:10.1007/s00420-021-01694-y), 2021-04-17
Supplement: 420_2021_1694_MOESM1_ESM.pdf [file 420_2021_1694_MOESM1_ESM.pdf]

**Article title:** Occupational cold exposure is associated with increased reporting of airway symptoms

**Journal name:** International Archives of Occupational and Environmental Health

**Author names:** Albin Stjernbrandt<sup>1</sup>, Nikolai Stenfors<sup>2</sup>, Ingrid Liljelind<sup>1</sup>

**Affiliations:** <sup>1</sup>Section of Sustainable Health, Department of Public Health and Clinical Medicine, Umeå University; <sup>2</sup>Section of Medicine, Department of Public Health and Clinical Medicine, Umeå University, Sweden

**Corresponding author:** Albin Stjernbrandt (albin.stjernbrandt@umu.se)

Online Resource 1. Complete logistic regression table (Model 3) showing crude and adjusted odds ratios and ninety-five percent confidence intervals for reporting wheeze, chronic cough, and productive cough among currently working subjects (N=8 740).

| Variable                             | Categories      | Wheeze               |                                   | Chronic cough      |                                   | Productive cough    |                                   |
|--------------------------------------|-----------------|----------------------|-----------------------------------|--------------------|-----------------------------------|---------------------|-----------------------------------|
|                                      |                 | Crude OR (95% CI)    | Adjusted <sup>a</sup> OR (95% CI) | Crude OR (95% CI)  | Adjusted <sup>a</sup> OR (95% CI) | Crude OR (95% CI)   | Adjusted <sup>a</sup> OR (95% CI) |
| Occupational cold exposure           | None (NRS≤1)    | 1.00                 | 1.00                              | 1.00               | 1.00                              | 1.00                | 1.00                              |
|                                      | Any (NRS 2–10)  | 1.23 (1.10–1.37)*    | 1.27 (1.11–1.44)*                 | 1.20 (1.08–1.33)*  | 1.23 (1.10–1.38)*                 | 1.30 (1.17–1.44)*   | 1.27 (1.13–1.43)*                 |
| Gender                               | Male            | 1.00                 | 1.00                              | 1.00               | 1.00                              | 1.00                | 1.00                              |
|                                      | Female          | 1.16 (1.04–1.29)*    | 1.27 (1.11–1.45)*                 | 1.22 (1.10–1.36)*  | 1.32 (1.18–1.49)*                 | 0.94 (0.85–1.05)    | 0.99 (0.87–1.11)                  |
| Age group (years)                    | 18–40           | 1.00                 | 1.00                              | 1.00               | 1.00                              | 1.00                | 1.00                              |
|                                      | 41–54           | 1.05 (0.91–1.21)     | 1.06 (0.89–1.25)                  | 0.93 (0.81–1.06)   | 0.90 (0.79–1.04)                  | 0.94 (0.82–1.07)    | 0.93 (0.80–1.08)                  |
|                                      | 55–63           | 1.28 (1.11–1.48)*    | 1.30 (1.09–1.54)*                 | 1.11 (0.97–1.27)   | 1.05 (0.91–1.22)                  | 1.11 (0.97–1.28)    | 1.05 (0.90–1.22)                  |
|                                      | 64–70           | 1.06 (0.85–1.31)     | 1.10 (0.85–1.42)                  | 0.85 (0.69–1.05)   | 0.77 (0.61–0.96)*                 | 0.91 (0.74–1.12)    | 0.77 (0.61–0.98)*                 |
| Body mass index (kg/m <sup>2</sup> ) | <18.5           | 1.41 (0.77–2.59)     | 1.37 (0.68–2.73)                  | 1.66 (0.98–2.80)   | 1.49 (0.86–2.59)                  | 2.05 (1.22–3.44)*   | 1.98 (1.14–3.44)*                 |
|                                      | 18.5 ≤ BMI < 25 | 1.00                 | 1.00                              | 1.00               | 1.00                              | 1.00                | 1.00                              |
|                                      | BMI ≥ 25        | 1.96 (1.75–2.19)*    | 1.96 (1.71–2.24)*                 | 1.32 (1.19–1.47)*  | 1.30 (1.16–1.45)*                 | 1.53 (1.37–1.70)*   | 1.41 (1.25–1.59)*                 |
| Daily smoking                        | No              | 1.00                 | 1.00                              | 1.00               | 1.00                              | 1.00                | 1.00                              |
|                                      | Yes             | 2.54 (2.14–3.01)*    | 3.39 (2.79–4.11)*                 | 1.95 (1.64–2.32)*  | 1.99 (1.66–2.39)*                 | 2.81 (2.37–3.32)*   | 3.12 (2.60–3.75)*                 |
| Asthma                               | No              | 1.00                 | 1.00                              | 1.00               | 1.00                              | 1.00                | 1.00                              |
|                                      | Yes             | 11.85 (10.27–13.68)* | 13.23 (11.34–15.43)*              | 2.87 (2.50–3.29)*  | 2.78 (2.41–3.21)*                 | 4.33 (3.78–4.96)*   | 4.52 (3.92–5.22)*                 |
| COPD                                 | No              | 1.00                 | 1.00                              | 1.00               | 1.00                              | 1.00                | 1.00                              |
|                                      | Yes             | 12.40 (6.87–22.38)*  | 7.55 (3.73–15.25)*                | 6.99 (4.06–12.04)* | 4.54 (2.50–8.27)*                 | 16.66 (8.62–32.18)* | 11.60 (5.56–24.20)*               |

\*Significant at the 0.05 level. <sup>a</sup> Adjusted for all other covariates. BMI: Body mass index; COPD: Chronic obstructive pulmonary disease; NRS:

Numerical rating scale.
